# Supplementary material
Source: publisher figshare collection journal article supplement (https://asha.figshare.com/articles/dataset/_/25156223)
Supplement: Supplementary file 1 [file 1]

**Supplemental Material S10.** Toy sets provided to participants.

---

Toys Provided, Total Combined Value ~ \$100

---

1. Melissa & Doug Animal Rescue Shape-Sorting Truck
  2. Melissa & Doug Birthday Party Cake
  3. Melissa & Doug K's Kids Stacking Blocks Set with Sorting Shapes
  4. Hasbro Mr. Potato Head – Mr. B-Day
  5. Aurora Hand Puppet – 10' Garth Dog
-
