# Supplementary material
Source: publisher figshare collection journal article supplement (https://asha.figshare.com/articles/dataset/_/25156223)
Supplement: Supplementary file 2 [file 1]

## Supplemental Material S4. MyCap weekly survey.

### MyCap Weekly Survey

|                                                                                                                                     |                                                                                                                                                                                                                                                                                                                                                                                                                                                                                                                                                                                                                                                                                                                                                                                                                                                                                                                                       |
|-------------------------------------------------------------------------------------------------------------------------------------|---------------------------------------------------------------------------------------------------------------------------------------------------------------------------------------------------------------------------------------------------------------------------------------------------------------------------------------------------------------------------------------------------------------------------------------------------------------------------------------------------------------------------------------------------------------------------------------------------------------------------------------------------------------------------------------------------------------------------------------------------------------------------------------------------------------------------------------------------------------------------------------------------------------------------------------|
| Study ID                                                                                                                            |                                                                                                                                                                                                                                                                                                                                                                                                                                                                                                                                                                                                                                                                                                                                                                                                                                                                                                                                       |
| How are you doing today?                                                                                                            | <input type="radio"/> I'm having a great day<br><input type="radio"/> I'm having a better day than usual<br><input type="radio"/> My day has been average<br><input type="radio"/> I'm having a worse day than usual<br><input type="radio"/> I'm having a bad day                                                                                                                                                                                                                                                                                                                                                                                                                                                                                                                                                                                                                                                                    |
| How often have you used the strategies you've learned in the past week?                                                             | <input type="radio"/> I used the strategies several times a day<br><input type="radio"/> I used the strategies once a day<br><input type="radio"/> I used them a few times throughout the week<br><input type="radio"/> I used them once or twice<br><input type="radio"/> I didn't use them                                                                                                                                                                                                                                                                                                                                                                                                                                                                                                                                                                                                                                          |
| How helpful did you find the strategies?                                                                                            | <input type="radio"/> Extremely helpful<br><input type="radio"/> Somewhat helpful<br><input type="radio"/> It made no difference<br><input type="radio"/> Somewhat unhelpful<br><input type="radio"/> Extremely unhelpful                                                                                                                                                                                                                                                                                                                                                                                                                                                                                                                                                                                                                                                                                                             |
| Have you looked at the teaching materials since we last met?                                                                        | <input type="radio"/> Yes<br><input type="radio"/> No                                                                                                                                                                                                                                                                                                                                                                                                                                                                                                                                                                                                                                                                                                                                                                                                                                                                                 |
| Have you looked at your recorded sessions since we last met?                                                                        | <input type="radio"/> Yes<br><input type="radio"/> No                                                                                                                                                                                                                                                                                                                                                                                                                                                                                                                                                                                                                                                                                                                                                                                                                                                                                 |
| Is there anything preventing you from using the strategies you're learning more often or more successfully? (Select all that apply) | <input type="checkbox"/> No, I'm successfully using the strategies<br><input type="checkbox"/> I don't really understand this intervention<br><input type="checkbox"/> I don't understand one or more of the strategies we've worked on<br><input type="checkbox"/> I need more guided practice with my therapist<br><input type="checkbox"/> I can't figure out how to fit these strategies into our routines<br><input type="checkbox"/> I don't like the strategies<br><input type="checkbox"/> I don't think this works with my child<br><input type="checkbox"/> Using the strategies seems to be making my child's behavior worse<br><input type="checkbox"/> I don't have time to use these strategies<br><input type="checkbox"/> I have multiple children to attend to<br><input type="checkbox"/> Someone in my household is unsupportive of me using these strategies<br><input type="checkbox"/> Something else (explain) |
| Which strategy(s) are you having a hard time with?                                                                                  |                                                                                                                                                                                                                                                                                                                                                                                                                                                                                                                                                                                                                                                                                                                                                                                                                                                                                                                                       |
| Please explain the other thing that's preventing you:                                                                               |                                                                                                                                                                                                                                                                                                                                                                                                                                                                                                                                                                                                                                                                                                                                                                                                                                                                                                                                       |

---

Are there any changes you'd like us to make in the teaching sessions?

- ☐ No, everything is great - no changes needed
  - ☐ I want more teaching sessions without my child
  - ☐ I want to watch more videos of the therapist using the strategies
  - ☐ I want to watch fewer videos of the therapist using the strategies
  - ☐ I want to walk through more ways I can use the strategies with my child in my daily life
  - ☐ I want something else (explain)
- 

What other change would you like us to make in the teaching sessions?

---



---

Are there any changes you'd like us to make to the practice sessions?

- ☐ No, everything is great - no changes needed
  - ☐ I want more coaching while I'm practicing with my child
  - ☐ I want less coaching while I'm practicing with my child
  - ☐ I want you to coach me differently
  - ☐ I want more practice with my child
  - ☐ I want something else (explain)
- 

How would you like us to coach you differently?

---



---

Please explain the other change you want to the practice sessions:

---



---

Are there any changes you'd like us to make to what you do outside of sessions?

- ☐ No, everything is great - no changes needed
  - ☐ I want more activities and information that I can review on my own, outside of sessions
  - ☐ I want fewer activities or information that I have to review on my own, outside of sessions
  - ☐ Teach me how to use the strategies when I have multiple children
  - ☐ Help me figure out the best way to share information about the strategies with a significant other / partner
  - ☐ Help me respond to my child's tantrums or excessive crying
  - ☐ I want something else (explain)
- 

Please explain the other change you'd like to what you do outside of sessions:

---



---

Are there any changes you'd like us to make in regards to timing or length of the sessions?

- ☐ No, everything is great - no changes needed
- ☐ I would like the sessions to be longer
- ☐ I would like the sessions to be shorter
- ☐ I would like to meet at a different time of day
- ☐ I would like text message reminders about our upcoming sessions
- ☐ I would like email reminders about our upcoming sessions
- ☐ I would like something else

|                                                                                                   |                                                                                                      |
|---------------------------------------------------------------------------------------------------|------------------------------------------------------------------------------------------------------|
| Please explain what other change you'd like us to make to timing or length of the sessions:       |                                                                                                      |
| Do you have any questions for your therapist that you want to talk about before the next session? | <input type="radio"/> Yes<br><input type="radio"/> No                                                |
| What are your questions?                                                                          |                                                                                                      |
| <b>MyCap App Fields - Do Not Modify</b>                                                           |                                                                                                      |
| UUID                                                                                              |                                                                                                      |
| Start Date                                                                                        |                                                                                                      |
| End Date                                                                                          |                                                                                                      |
| Schedule Date                                                                                     |                                                                                                      |
| Status                                                                                            | <input type="radio"/> Deleted<br><input type="radio"/> Completed<br><input type="radio"/> Incomplete |
| Supplemental Data (JSON)                                                                          |                                                                                                      |
| Serialized Result                                                                                 |                                                                                                      |
