# Supplementary material
Source: publisher figshare collection journal article supplement (https://asha.figshare.com/articles/dataset/_/25156223)
Supplement: Supplementary file 4 [file 1]

**Supplemental Material S9.** Supplemental effect sizes for number of different words child outcome data.

| Participant ID | LRRi  | SE   | % Increase | 95% CI       | SMD   | SE   | 95% CI       |
|----------------|-------|------|------------|--------------|-------|------|--------------|
| Child A        | 0.70* | 0.32 | 102%       | [0.08-1.33]  | 1.16* | 0.55 | [0.08-2.25]  |
| Child B        | 0.29  | 0.39 | 34%        | [-0.47-1.06] | 0.39  | 0.39 | [-0.38-1.17] |
| Child C        | 0.48  | 0.39 | 62%        | [-0.28-1.25] | 0.63  | 0.45 | [-0.25-1.52] |

*Note.* \* = Significant estimate as 95% confidence interval does not include zero; LRRi = Log response ratio increasing; SMD = Standardized mean difference; CI = Confidence interval; SE = Standard error
