# Supplementary material
Source: publisher figshare collection journal article supplement (https://asha.figshare.com/articles/dataset/_/25156223)
Supplement: Supplementary file 5 [file 1]

**Supplemental Material S8.** Supplemental effect sizes for EMT fidelity checklist data.

| Participant ID | Tier / Checklist    | SMD    | SE   | 95% CI        |
|----------------|---------------------|--------|------|---------------|
| Caregiver A    | Tier 1: Engagement  | 4.68*  | 1.30 | [2.13-7.23]   |
|                | Tier 2: Language    | 8.62*  | 1.64 | [5.41-11.82]  |
|                | Tier 3: Play + Talk | 8.31*  | 1.30 | [5.76-10.86]  |
|                | Tier 4: Prompting   | --     | --   | --            |
| Caregiver B    | Tier 1: Engagement  | 3.56*  | 1.02 | [1.57-5.55]   |
|                | Tier 2: Language    | 3.21*  | 0.74 | [1.76-4.66]   |
|                | Tier 3: Play + Talk | 13.51* | 2.13 | [9.33-17.68]  |
|                | Tier 4: Prompting   | 14.27* | 1.93 | [10.49-18.05] |
| Caregiver C    | Tier 1: Engagement  | 4.36*  | 1.23 | [1.95-6.77]   |
|                | Tier 2: Language    | 3.04*  | 0.69 | [1.70-4.39]   |
|                | Tier 3: Play + Talk | 12.68* | 1.86 | [9.04-16.32]  |
|                | Tier 4: Prompting   | --     | --   | --            |

*Note.* \* = Significant estimate as 95% confidence interval does not include zero; EMT = Enhanced milieu teaching; SMD = Standardized mean difference; CI = Confidence interval; SE = Standard error
