# Supplementary material
Source: publisher figshare collection journal article supplement (https://asha.figshare.com/articles/dataset/_/25156223)
Supplement: Supplementary file 8 [file 1]

**Supplemental Material S7.** Supplemental effect sizes for timed-event sampled key EMT strategy data.

| Participant ID | Tier / EMT Key Strategy | LRRi  | SE   | % Increase | 95% CI      | SMD    | SE   | 95% CI        |
|----------------|-------------------------|-------|------|------------|-------------|--------|------|---------------|
| Caregiver A    | Tier 1: Matched turns   | 1.13* | 0.14 | 208%       | [0.85-1.40] | 5.23*  | 1.44 | [2.41-8.06]   |
|                | Tier 2: Target talk     | 1.14* | 0.22 | 214%       | [0.71-1.57] | 2.55*  | 0.54 | [1.49-3.60]   |
|                | Tier 2: Expansions      | 1.93* | 0.20 | 588%       | [1.55-2.31] | 7.65*  | 2.21 | [3.32-11.99]  |
|                | Tier 3: Play + Talk     | 2.12* | 0.12 | 731%       | [1.88-2.35] | 14.72* | 2.70 | [9.43-20.02]  |
|                | Tier 4: Prompting       | --    | --   | --         | --          | --     | --   | --            |
| Caregiver B    | Tier 1: Matched turns   | 1.43* | 0.15 | 316%       | [1.13-1.72] | 7.41*  | 2.02 | [3.46-11.36]  |
|                | Tier 2: Target talk     | 1.28* | 0.18 | 261%       | [0.94-1.63] | 4.11*  | 0.87 | [2.39-5.82]   |
|                | Tier 2: Expansions      | 0.68* | 0.27 | 97%        | [16, 235]   | 1.09   | 0.62 | [-0.13-2.31]  |
|                | Tier 3: Play + Talk     | --    | --   | --         | --          | --     | --   | --            |
|                | Tier 4: Prompting       | --    | --   | --         | --          | --     | --   | --            |
| Caregiver C    | Tier 1: Matched turns   | 1.14* | 0.10 | 212%       | [154-282]   | 7.20*  | 1.96 | [3.36-11.05]  |
|                | Tier 2: Target talk     | 0.83* | 0.16 | 129%       | [0.51-1.15] | 2.23*  | 0.53 | [1.19-3.27]   |
|                | Tier 2: Expansions      | --    | --   | --         | --          | --     | --   | --            |
|                | Tier 3: Play + Talk     | 1.94* | 0.12 | 593%       | [1.71-2.16] | 19.40* | 3.43 | [12.69-26.12] |
|                | Tier 4: Prompting       | --    | --   | --         | --          | --     | --   | --            |

*Note.* \* = Significant estimate as 95% confidence interval does not include zero; EMT = Enhanced milieu teaching; LRRi = Log response ratio increasing; SMD = Standardized mean difference; CI = Confidence interval; SE = Standard error
