# Supplementary material
Source: publisher figshare collection journal article supplement (https://asha.figshare.com/articles/dataset/_/25156223)
Supplement: Supplementary file 9 [file 1]

## Supplemental Material S6. Social validity follow-up survey.

### Follow Up Questionnaire

Please complete the survey below.  
Thank you!

**The first section of this survey involves the interventions, therapies, or services that your child has participated in.**

Has the child who enrolled in the study also participated in early intervention services, pre-school, ABA, or other therapies? ☐ No ☐ Yes ☐ Unsure

What service(s) is/was your child enrolled in? (Check all that apply)

- ☐ Applied Behavior Analysis (ABA)
- ☐ Speech Therapy
- ☐ Occupational Therapy
- ☐ Physical Therapy
- ☐ Developmental Therapy
- ☐ Preschool
- ☐ Other early intervention
- ☐ Unsure

Other:

---

Did any of these services begin after you started or finished learning the intervention? (Check all that apply)

- ☐ Applied Behavior Analysis (ABA)
- ☐ Speech Therapy
- ☐ Occupational Therapy
- ☐ Physical Therapy
- ☐ Developmental Therapy
- ☐ Preschool
- ☐ Other early intervention
- ☐ Unsure

**We want to learn how our intervention might help children and their families who have just received an autism diagnosis prepare for later therapies.**

**Please tell us how the intervention prepared your family for later services (e.g., ABA, related therapies, preschool).**

How was participating in this study helpful for: preparing your child for other therapies?

- ☐ 1 Very Unhelpful ☐ 2 Somewhat Unhelpful ☐ 3 Neutral / Don't know ☐ 4 Somewhat Helpful  
☐ 5 Very Helpful

---

How was participating in this study helpful for: preparing you (the caregiver) for your child's therapies?

- ☐ 1 Very Unhelpful   ☐ 2 Somewhat Unhelpful   ☐ 3 Neutral / Don't know   ☐ 4 Somewhat Helpful  
☐ 5 Very Helpful

---

Please tell us about your experiences in starting other therapies with your child.

---

**We want to learn how to support caregivers after their children receive an autism diagnosis.**

**Your answers do not need to be related to the intervention you received - we are interested in the entire experience of diagnosis and early intervention.**

How was participating in this study helpful for: increasing your understanding of the autism spectrum?

- ☐ 1 Very Unhelpful   ☐ 2 Somewhat Unhelpful   ☐ 3 Neutral / Don't know   ☐ 4 Somewhat Helpful  
☐ 5 Very Helpful

---

What things were particularly difficult for you following your child's autism diagnosis? (e.g., navigating services, challenging behavior, telling other people, etc.)

---

What more could we have done to help you immediately following your child's diagnosis?

---

What supports or services (e.g., parent-to-parent groups, more information, quicker access to early intervention, counseling) would have been helpful to you immediately following your child's diagnosis?

---

What supports or services (e.g., parent-to-parent groups, more information, quicker access to early intervention, counseling) do you think other parents of children with autism might want or need immediately following their child's diagnosis?

---

Is there anything else you would like to share that would help us provide a better intervention for families who have a child recently diagnosed with autism?

| Please answer the next few questions about yourself.                                                                       |                       |                       |                       |                       |                       |                       |
|----------------------------------------------------------------------------------------------------------------------------|-----------------------|-----------------------|-----------------------|-----------------------|-----------------------|-----------------------|
|                                                                                                                            | 1 - Strongly Disagree | 2                     | 3                     | 4                     | 5                     | 6 - Strongly Agree    |
| I can always think of something to play with my child.                                                                     | <input type="radio"/> |
| I am a fun playmate for my toddler.                                                                                        | <input type="radio"/> |
| I find it hard to loosen up and just play with my child.                                                                   | <input type="radio"/> |
| I am able to get actively involved in playing with my child.                                                               | <input type="radio"/> |
| Playing is a part of my relationship with my child that I have very little difficulty with.                                | <input type="radio"/> |
| I really need to learn how to just have fun with my child.                                                                 | <input type="radio"/> |
| I think I spend an appropriate amount of time just playing with my child.                                                  | <input type="radio"/> |
| I believe my toddler learns a great deal from my efforts to show him/her things.                                           | <input type="radio"/> |
| Assisting my child with learning to talk and understand words is a part of parenting that I leave to others.               | <input type="radio"/> |
| Sitting down regularly with my child to read or do some other one-on-one activity is not difficult for me.                 | <input type="radio"/> |
| I am probably not that great at teaching my child about the world.                                                         | <input type="radio"/> |
| I have some difficulty figuring out the appropriate level of instruction when I'm trying to explain something to my child. | <input type="radio"/> |
| Helping my child learn colors, names of objects, etc. is not one of my strongest points.                                   | <input type="radio"/> |
| My child learns more from me than anyone else in his/her life.                                                             | <input type="radio"/> |

|                                                                                                                                                  |                       |                       |                       |                       |                       |                       |
|--------------------------------------------------------------------------------------------------------------------------------------------------|-----------------------|-----------------------|-----------------------|-----------------------|-----------------------|-----------------------|
| I easily find opportunities to point out things about the world during my daily interactions with my child.                                      | <input type="radio"/> |
| Although I would like to help my child learn more about his/her surroundings, this is an area of parenting that I do not feel well-equipped for. | <input type="radio"/> |
| I have been able to establish a daily routine with my toddler that feels comfortable to both of us.                                              | <input type="radio"/> |
| I am able to provide my child with a comfortable amount of daily structure.                                                                      | <input type="radio"/> |
| I have been successful in getting my child to eat on a fairly regular schedule.                                                                  | <input type="radio"/> |
| I feel like I have no control over my child's sleep habits.                                                                                      | <input type="radio"/> |
| I am not very good at getting my child to stick to a regular daily schedule.                                                                     | <input type="radio"/> |
| Although I have tried to train my child to eat well, my efforts have been met with very little success.                                          | <input type="radio"/> |
| I don't seem to be able to establish a regular bed time routine with my child.                                                                   | <input type="radio"/> |
| I have worked out a fairly regular morning routine with my toddler.                                                                              | <input type="radio"/> |

**Please answer the following questions about the intervention.**

|                                                                          | 1 - Strongly Disagree | 2                     | 3                     | 4                     | 5                     | 6 - Strongly Agree    |
|--------------------------------------------------------------------------|-----------------------|-----------------------|-----------------------|-----------------------|-----------------------|-----------------------|
| The intervention has helped my child's communication skills.             | <input type="radio"/> |
| My efforts working on communication with my child seem to be paying off. | <input type="radio"/> |

|                                                                                                                  |                       |                       |                       |                       |                       |                       |
|------------------------------------------------------------------------------------------------------------------|-----------------------|-----------------------|-----------------------|-----------------------|-----------------------|-----------------------|
| Helping my child learn communication skills is more work than I thought it would be.                             | <input type="radio"/> |
| As a result of the intervention, I am more effective as a language teacher for my child.                         | <input type="radio"/> |
| I am interested in learning more intervention strategies to help my child's communication skills.                | <input type="radio"/> |
| The intervention improved my child's behavior.                                                                   | <input type="radio"/> |
| The intervention has helped me become better able to support my child's positive behavior.                       | <input type="radio"/> |
| I was motivated to learn the intervention.                                                                       | <input type="radio"/> |
| I played an important role in the intervention.                                                                  | <input type="radio"/> |
| The time requirement involved in learning the intervention was reasonable.                                       | <input type="radio"/> |
| The intervention puts an added stress on our family.                                                             | <input type="radio"/> |
| I spent time outside of sessions practicing the intervention.                                                    | <input type="radio"/> |
| I often use the techniques at home with my child.                                                                | <input type="radio"/> |
| The coaching during training was helpful in learning the intervention.                                           | <input type="radio"/> |
| The materials provided during training were helpful in learning the intervention.                                | <input type="radio"/> |
| I would recommend this intervention to a friend who was concerned about his or her child's communication skills. | <input type="radio"/> |
